# Supplementary material for: Design of a Portable Orthogonal Surface Acoustic Wave Sensor System for Simultaneous Sensing and Removal of Nonspecifically Bound Proteins
Source: MDPI journal article supplement (doi:10.3390/s19183876), 2019-09-08
Supplement: s1 [file s1]

## Supplementary Material

The phase vs frequency response of the prototype was compared with the VNA test results, as show in Figure S1. The VNA provides the phase range from -180 to 180 degrees, whereas our prototype provides the phase range from 0 to 180 degrees. Hence, the apparent difference in appearance between the two data.

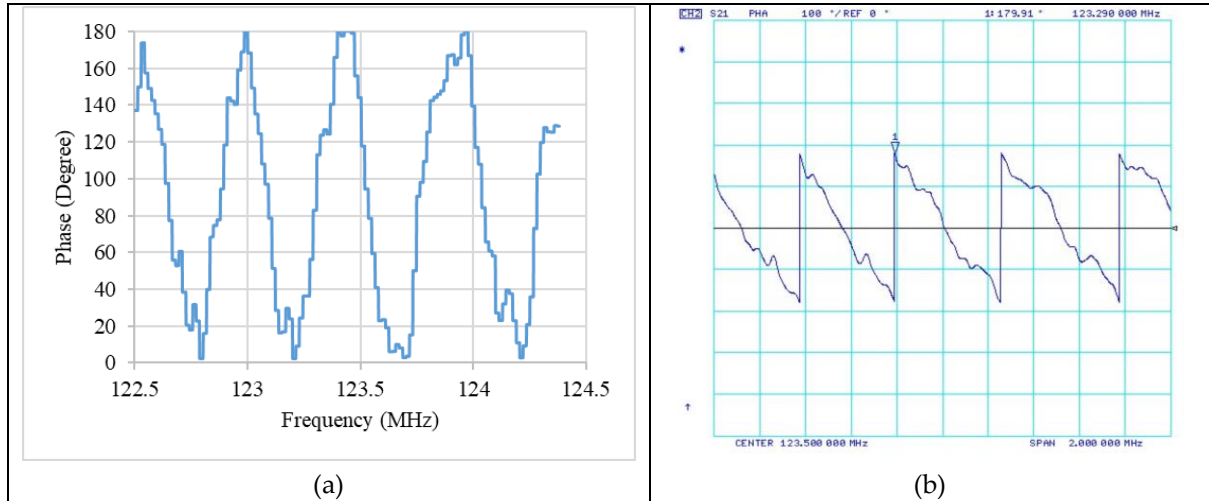

Figure S1. Comparison of phase vs frequency (a) portable prototype and (b) VNA.
